# Supplementary material
Source: PubMed Central journal article supplement (PMC7016918)
Supplement: ao9b03084_si_001.pdf [file ao9b03084_si_001.pdf]

# Toxicological risks of Renqingchangjue in rats evaluated by <sup>1</sup>H-NMR based serum and urine metabolomics analysis

Xia Wang<sup>a, #</sup>, Caidan Rezeng<sup>b, #</sup>, Yingfeng Wang<sup>a</sup>, Jian Li<sup>c</sup>, Lan Zhang<sup>a</sup>, Jianxin Chen<sup>c\*</sup>, Zhongfeng Li<sup>a\*</sup>

- a. *Department of Chemistry, Capital Normal University, No. 105, Xisanhuanbeilu, Haidian District, Beijing 100048, PR China.*
- b. *College of Pharmacy, Qinghai Nationalities University, No.3 Bayizhong Road, Xining, 810000, PR China.*
- c. *Beijing University of Chinese Medicine, No.11 Beisanhuandonglu, Chaoyang District, Beijing 100029, PR China.*

## **\*To whom correspondence should be addressed:**

Zhongfeng Li

Department of Chemistry, Capital Normal University,  
No.105 Xisanhuanbeilu, Haidian District,  
Beijing 100048, China  
Tel: +86-10-68902655  
Fax: +86-10-68902687  
E-mail: [lizf@cnu.edu.cn](mailto:lizf@cnu.edu.cn)

Jianxin Chen

Beijing University of Chinese Medicine,  
No.11 Beisanhuandonglu, Chaoyang District,  
Beijing 100029, China.  
E-mail: [cjx@bucm.edu.cn](mailto:cjx@bucm.edu.cn)

Fax: +86-010-64286283; Tel: +86-010-64286508

# Xia Wang and Caidan Rezeng contributed equally to this work.

### Figure Captions:

**Figure S1.** Body weight of rats in four groups during RQCJ administration and withdrawal recovery. Day 0: one day before treatment, days 5–15: the time points of administration, days 18–30: the time points of stop administration. NC: Normal control group, LD: Low-dose group, MD: middle-dose group, HD: high-dose group.

**Figure S2.** PLS-DA score plot of serum(A, B) and urine (C, D) samples from the four groups at day 15 and day 30. NC: Normal control group, LD: Low-dose group, MD: middle-dose group, HD: high-dose group.

**Figure S3.** OPLS-DA score plots (A, C, E and G) and color-coded coefficient plots (B, D, F and H) of serum samples from LD, MD and NC group at day 15 and day 30. NC: Normal control group, LD: Low-dose group, MD: middle-dose group.

**Figure S4.** PCA score plot of urine samples from the four groups at day 0 (A), 3(B), 6 (C), 9 (D), 12 (E), 15 (F), 18 (G), 23 (H), 26 (I) and 30 (J). Day 0: one day before treatment, days 3–15: the time points of administration, days 18–30: the time points of stop administration. NC: Normal control group, LD: Low-dose group, MD: middle-dose group, HD: high-dose group.

**Figure S5.** OPLS-DA score plots (A, C, E and G) and color-coded coefficient plots (B, D, F and H) of urine samples from LD, MD and NC group at day 15 and day 30. NC: Normal control group, LD: Low-dose group, MD: middle-dose group.

**Figure S6.** The network of potential biomarkers associated with RQCJ in serum by metscape analysis. The detected metabolites in our study are represented by red hexagons. Hexagons with green lines means that the alteration of the metabolite in HD groups had statistical significance ( $P < 0.05$ ). The size of hexagons indicates the fold change of the corresponding metabolite in HD relative to control. In addition, pink hexagons indicate metabolites participating in the metabolic pathway but not been detected in the study.

**Figure S7.** The network of potential biomarkers associated with RQCJ in urine by metscape analysis. The detected metabolites in our study are represented by red hexagons. Hexagons with green lines means that the alteration of the metabolite in HD groups had statistical significance ( $P < 0.05$ ). The size of hexagons indicates the fold change of the corresponding metabolite in HD relative to control. In addition, pink hexagons indicate metabolites participating in the metabolic pathway but not been detected in the study.

### Table Captions:

**Table S1.** Summary of serum clinical biochemical parameters at day 15 and day 30.

**Table S2.** Results from Pathway Analysis with MetPA from serum.

**Table S3.** Results from Pathway Analysis with MetPA from urine.

**Table S4.** Contents of As and Hg in serum sample of control and dosed-group. (ng/g)

**Table S5.** Contents of As and Hg in urine sample of control and dosed-group. (ng/g)

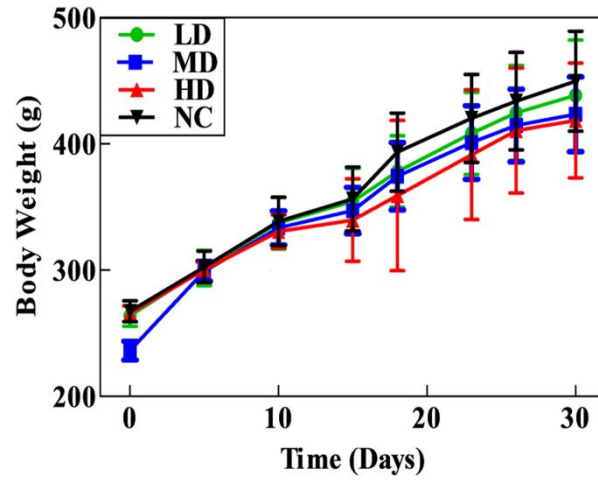

**Figure. S1.** Body weight of rats in four groups during RQCJ administration and withdrawal recovery. Day 0: one day before treatment, days 5–15: the time points of administration, days 18–30: the time points of stop administration. NC: Normal control group, LD: Low-dose group, MD: middle-dose group, HD: high-dose group.

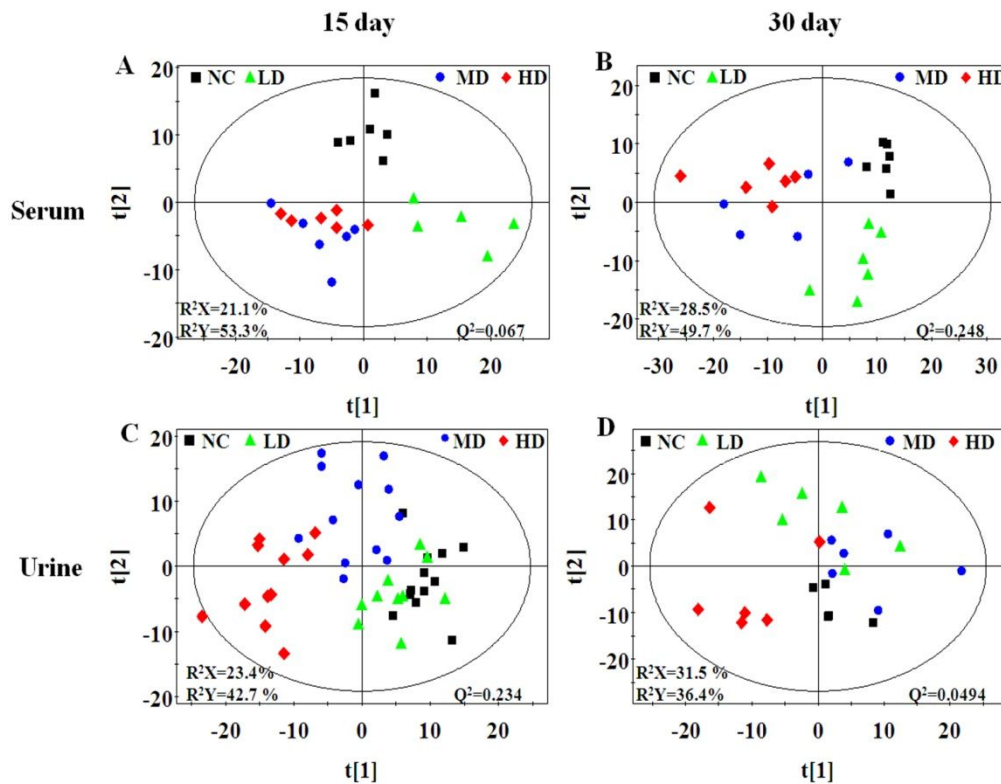

**Figure S2.** PLS-DA score plot of serum(A, B) and urine (C, D) samples from the four groups at day 15 and day 30. NC: Normal control group, LD: Low-dose group, MD: middle-dose group, HD: high-dose group.

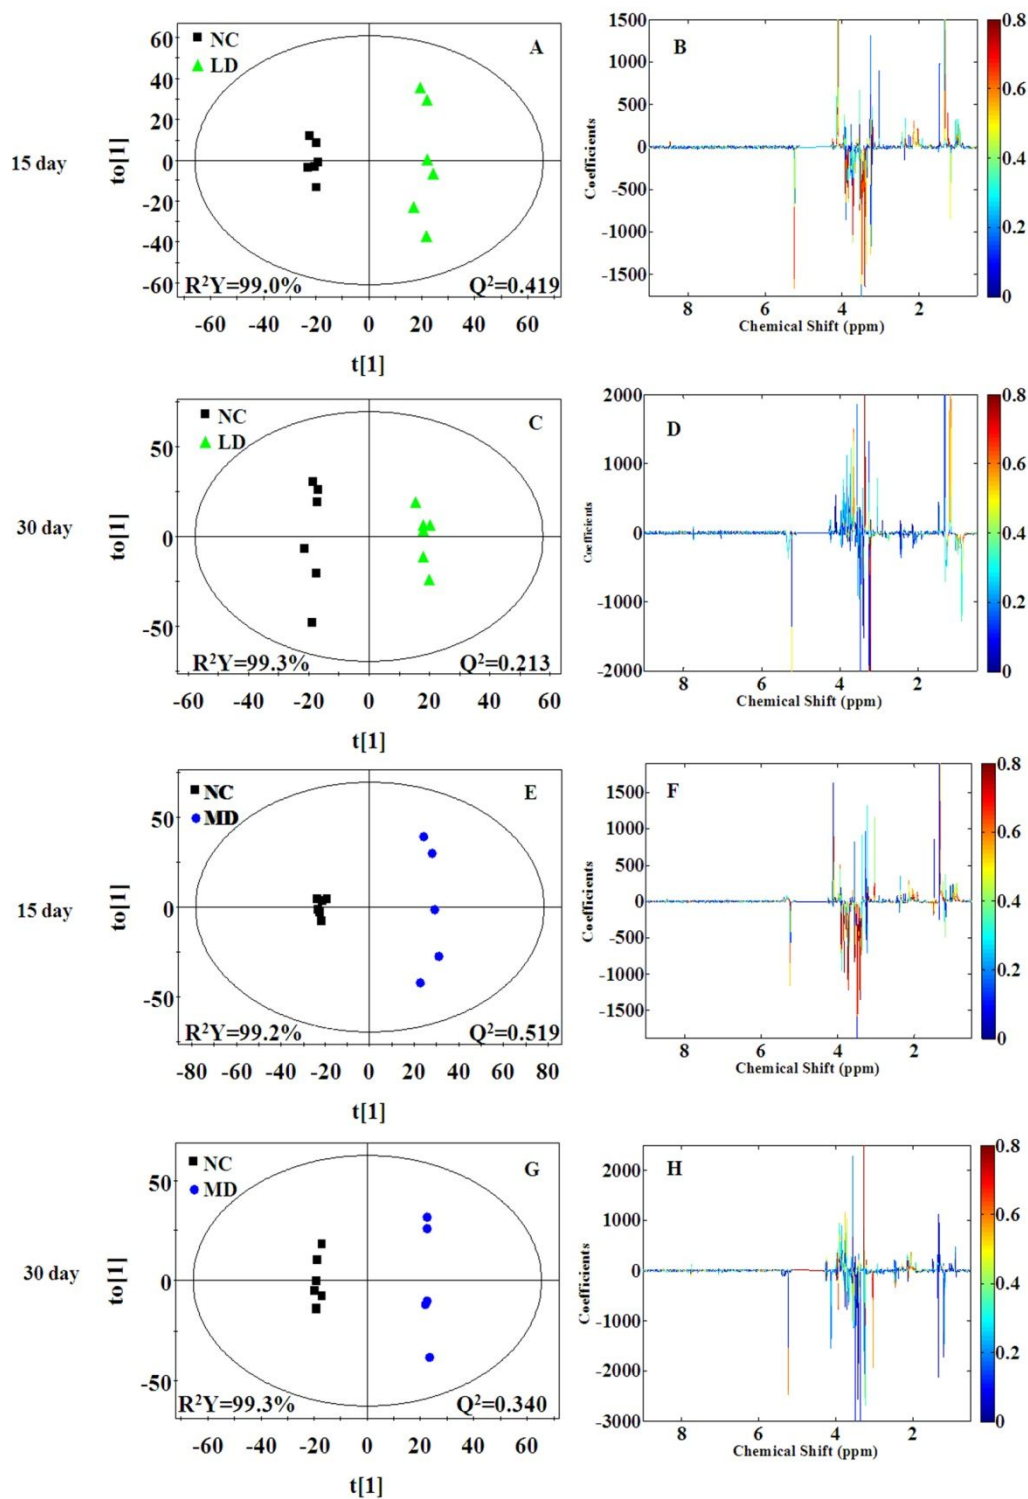

**Figure S3.** OPLS-DA score plots (A, C, E and G) and color-coded coefficient plots (B, D, F and H) of serum samples from LD, MD and NC group at day 15 and day 30. NC: Normal control group, LD: Low-dose group, MD: middle-dose group.

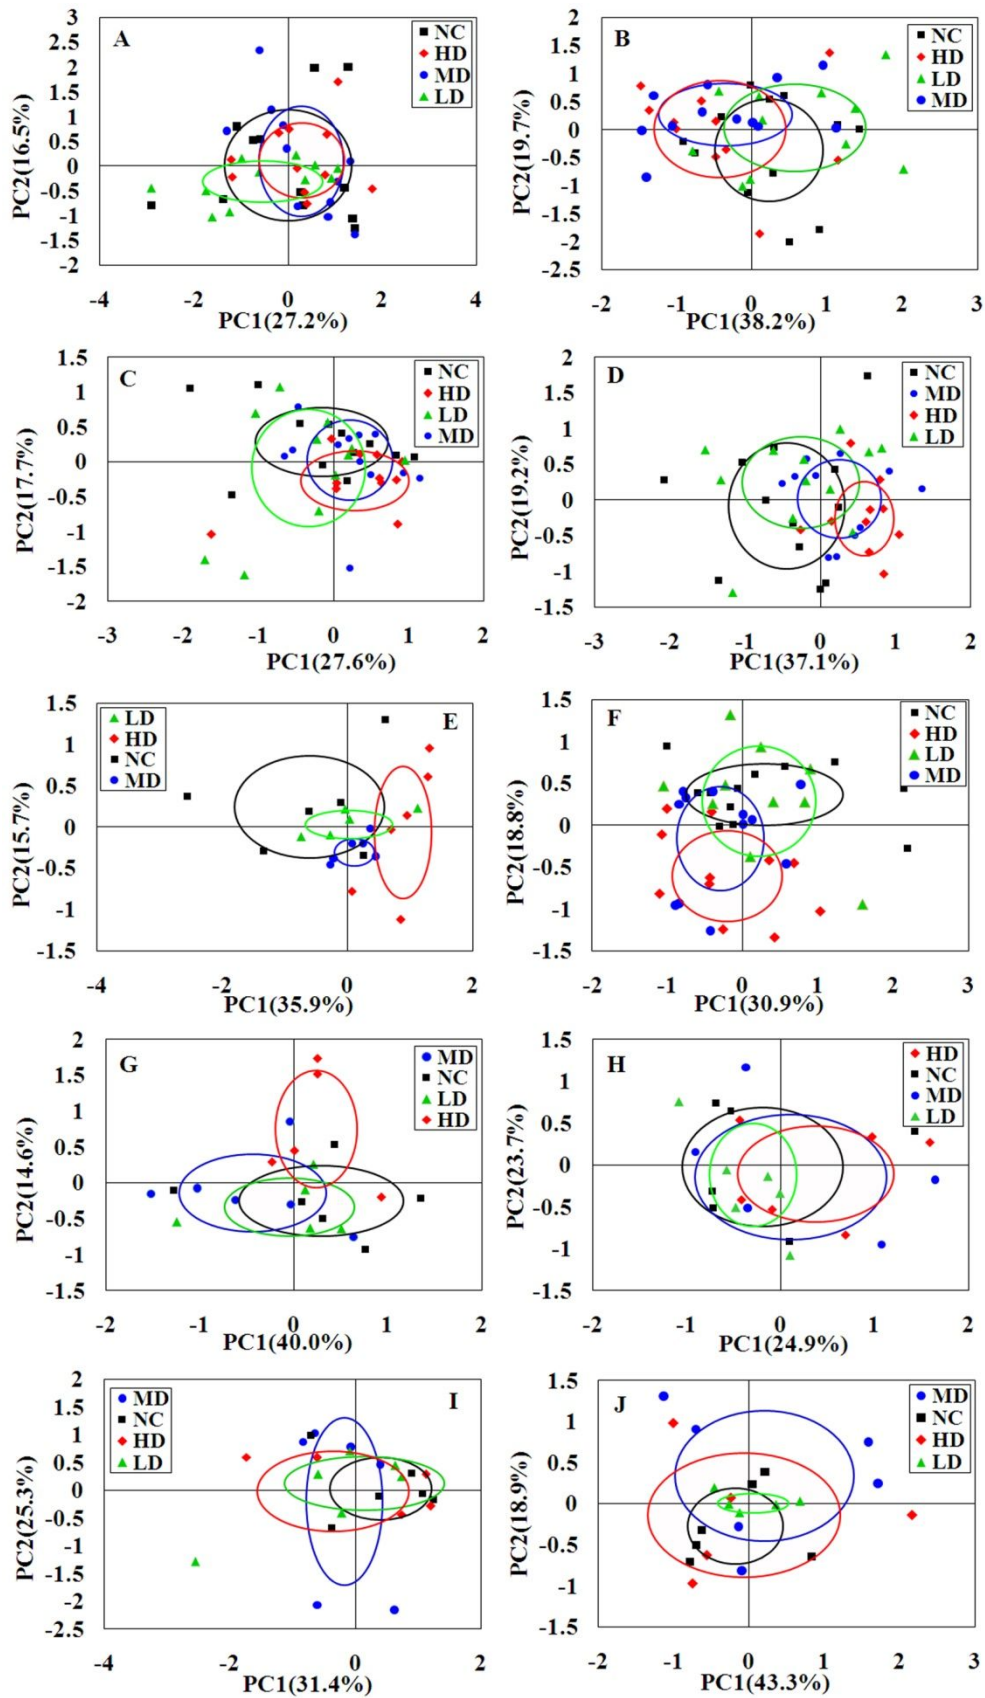

**Figure S4.** PCA score plot of urine samples from the four groups at day 0 (A), 3(B), 6 (C), 9 (D), 12 (E), 15 (F), 18 (G), 23 (H), 26 (I) and 30 (J). Day 0: one day before treatment, days 3–15: the time points of administration, days 18–30: the time points of stop administration. NC: Normal control group,

LD: Low-dose group, MD: middle-dose group, HD: high-dose group.

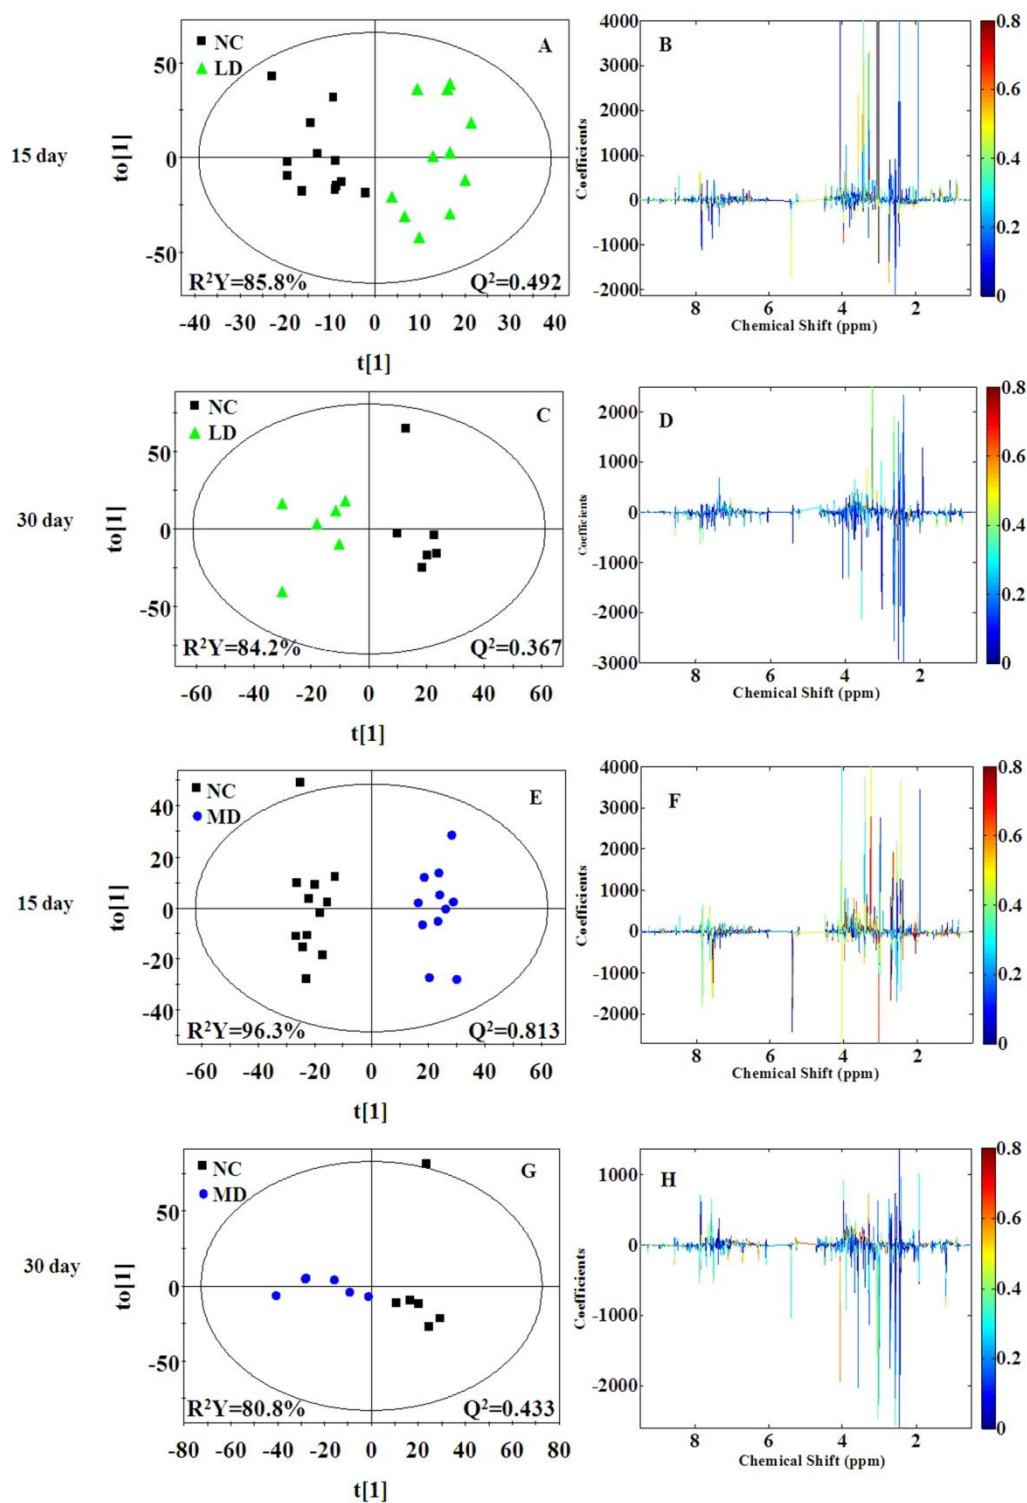

**Figure S5.** OPLS-DA score plots (A, C, E and G) and color-coded coefficient plots (B, D, F and H) of urine samples from LD, MD and NC group at day 15 and day 30. NC: Normal control group, LD: Low-dose group, MD: middle-dose group.

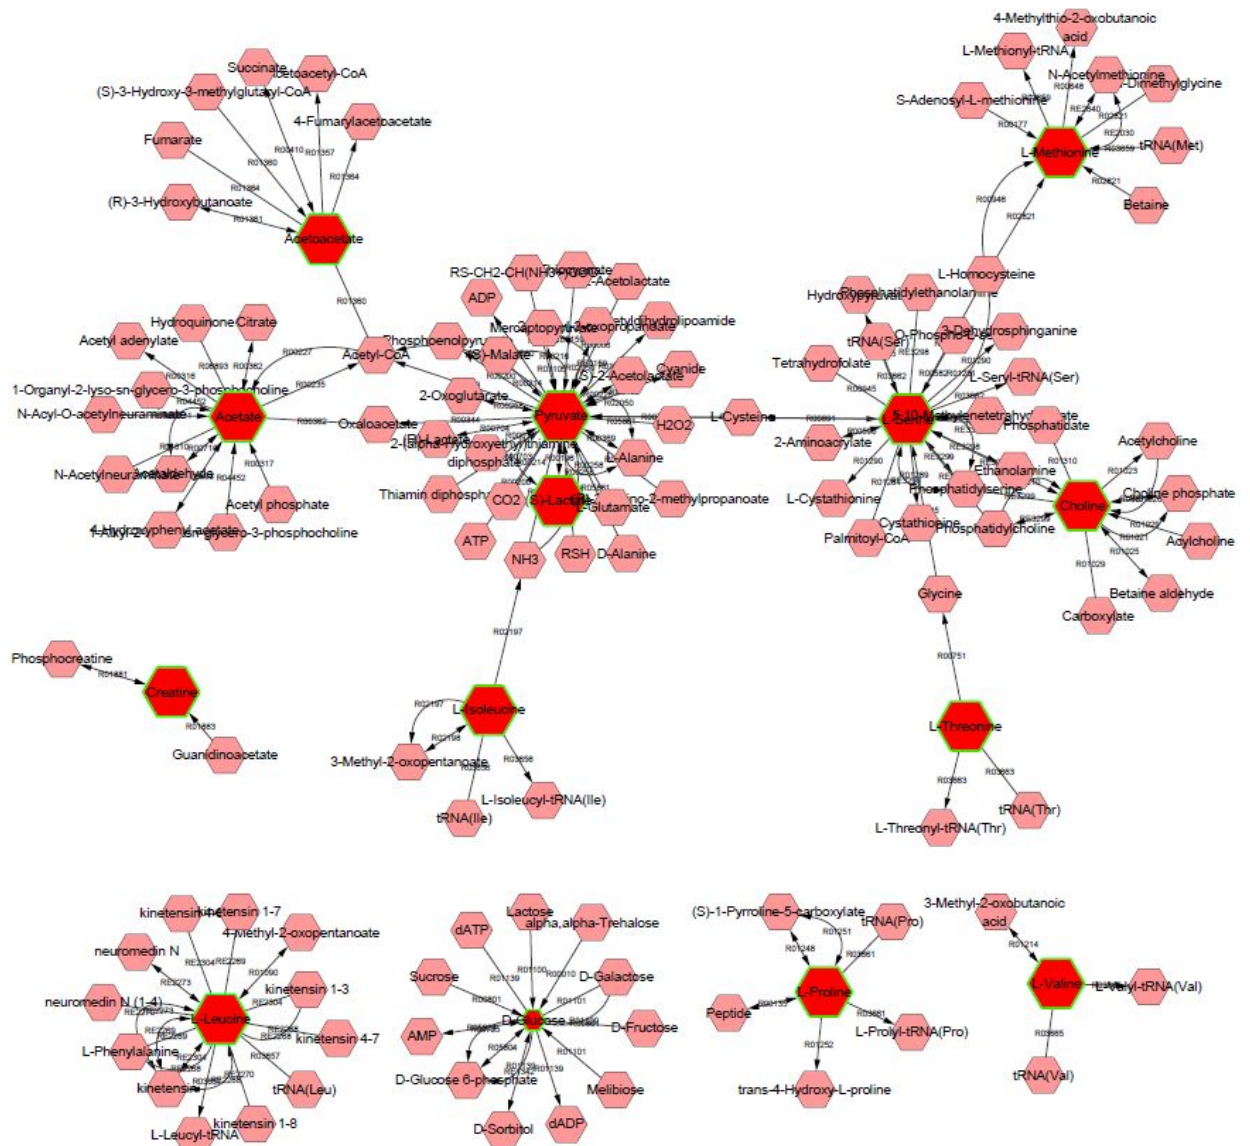

**Figure S6.** The network of potential biomarkers associated with RQCJ in serum by metscape analysis. The detected metabolites in our study are represented by red hexagons. Hexagons with green lines means that the alteration of the metabolite in HD groups had statistical significance ( $P < 0.05$ ). The size of hexagons indicates the fold change of the corresponding metabolite in HD relative to control. In addition, pink hexagons indicate metabolites participating in the metabolic pathway but not been detected in the study.

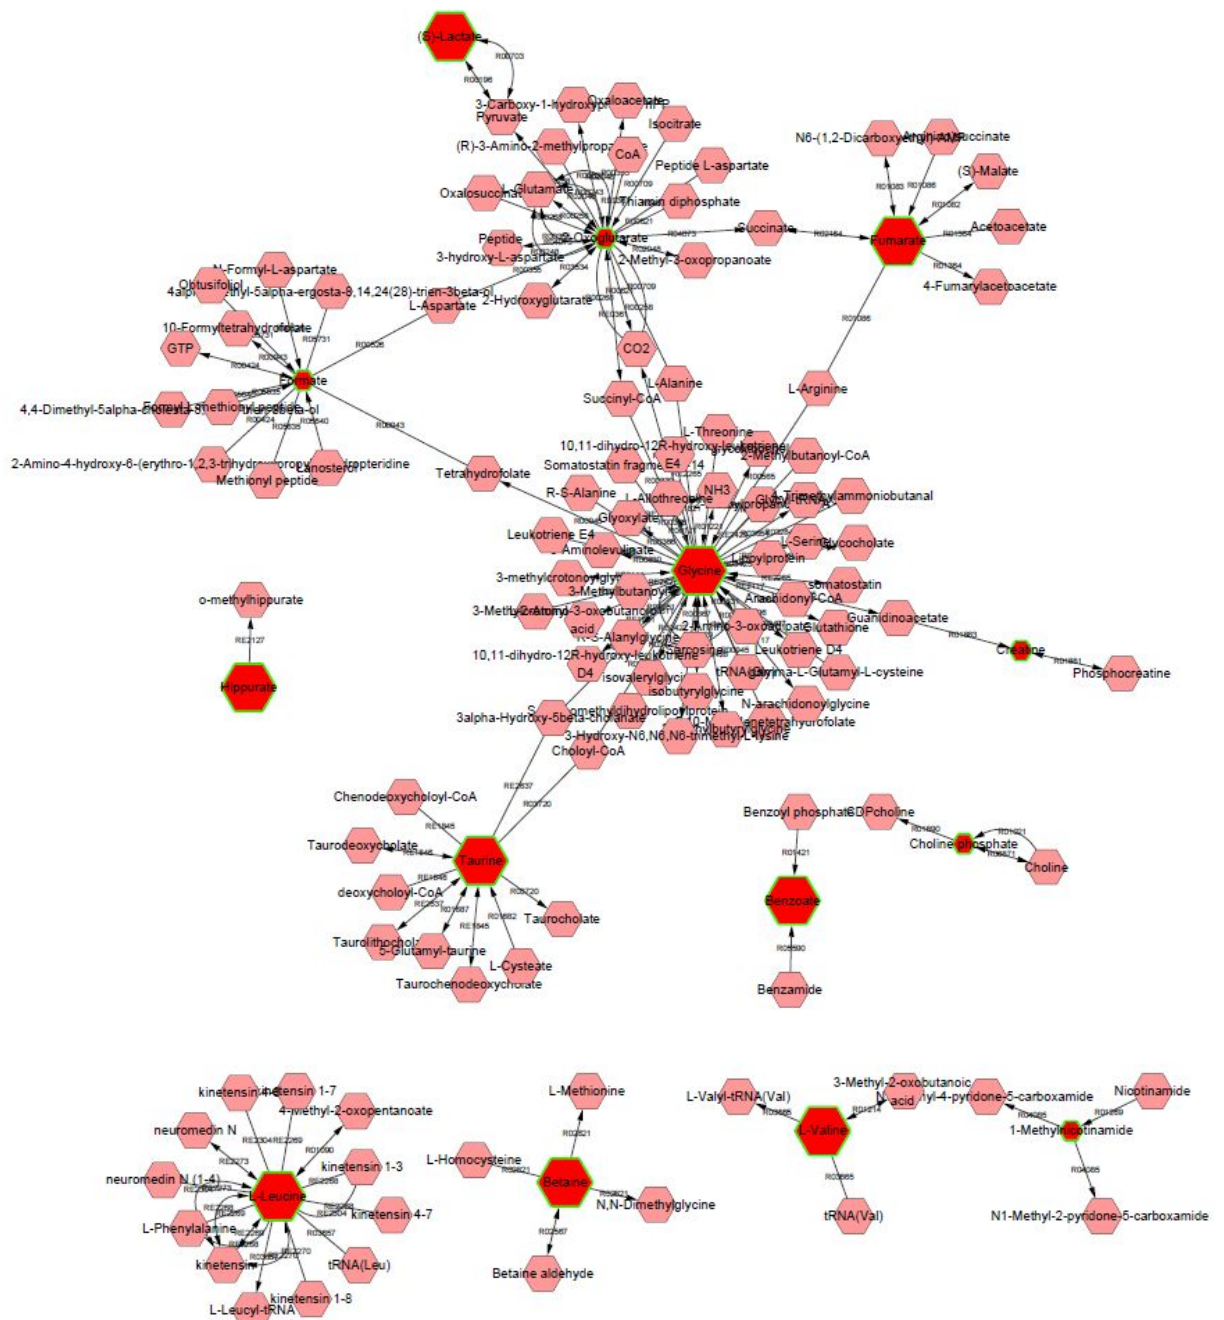

**Figure S7.** The network of potential biomarkers associated with RQCJ in urine by metscape analysis. The detected metabolites in our study are represented by red hexagons. Hexagons with green lines means that the alteration of the metabolite in HD groups had statistical significance ( $P < 0.05$ ). The size of hexagons indicates the fold change of the corresponding metabolite in HD relative to control. In addition, pink hexagons indicate metabolites participating in the metabolic pathway but not been detected in the study.



Table S1. Summary of serum clinical biochemical parameters at day 15 and day 30.

| Time   | Biochemical parameters | NC           | LD           | MD            | HD            |
|--------|------------------------|--------------|--------------|---------------|---------------|
| Day 15 | AST (IU/L)             | 152.90±52.30 | 136.80±14.01 | 190.60±56.91* | 224.28±35.01* |
|        | ALT (IU/L)             | 54.85±10.70  | 52.06±2.82*  | 56.67±10.00*  | 61.33±8.33*   |
|        | ALP (IU/L)             | 347.80±15.28 | 323.60±29.61 | 327.30±28.50  | 293.20±73.10* |
|        | BUN (mmol/L)           | 9.43±1.54    | 6.88±1.18*   | 7.93±0.42*    | 7.17±1.28*    |
| Day 30 | AST (IU/L)             | 193.60±43.01 | 177.40±41.40 | 196.30±48.67  | 203.00±58.20  |
|        | ALT (IU/L)             | 57.18±9.16   | 57.22±3.98   | 48.68±4.13    | 60.13±10.30   |
|        | ALP (IU/L)             | 268.30±84.03 | 252.70±47.80 | 259.70±33.01* | 265.60±34.10  |
|        | BUN (mmol/L)           | 9.39±0.44    | 9.02±1.40    | 7.52±0.95     | 8.93±0.87     |

Data were expressed as mean±SD (n=12). \*P<0.05 each dosed group vs. control group. NC: Normal control group, LD: Low-dose group, MD: middle-dose group, HD: high-dose group.

Table S2. Results from Pathway Analysis with MetPA from serum.

| Pathway Name                                | Total | Expected | Hits | Raw p    | -Log(p) | Holm adjust | FDR      | Impact  |
|---------------------------------------------|-------|----------|------|----------|---------|-------------|----------|---------|
| Aminoacyl-tRNA biosynthesis                 | 67    | 0.66904  | 7    | 1.10E-06 | 13.723  | 8.88E-05    | 8.02E-05 | 0.13793 |
| Valine, leucine and isoleucine biosynthesis | 11    | 0.10984  | 4    | 1.98E-06 | 13.133  | 0.000158    | 8.02E-05 | 0.99999 |
| Glycine, serine and threonine metabolism    | 32    | 0.31954  | 5    | 7.77E-06 | 11.765  | 0.000614    | 0.00021  | 0.2428  |
| Pyruvate metabolism                         | 22    | 0.21969  | 3    | 0.001093 | 6.8189  | 0.084153    | 0.017705 | 0.24337 |
| Glycolysis or Gluconeogenesis               | 26    | 0.25963  | 3    | 0.001802 | 6.3189  | 0.13694     | 0.024325 | 0.12753 |
| Cysteine and methionine metabolism          | 28    | 0.2796   | 3    | 0.002244 | 6.0997  | 0.16827     | 0.025961 | 0.1388  |
| Butanoate metabolism                        | 20    | 0.19971  | 2    | 0.015882 | 4.1425  | 1           | 0.16081  | 0.10145 |
| Synthesis and degradation of ketone bodies  | 5     | 0.049929 | 1    | 0.04901  | 3.0157  | 1           | 0.44109  | 0.6     |
| Arginine and proline metabolism             | 44    | 0.43937  | 2    | 0.068977 | 2.674   | 1           | 0.50792  | 0.07598 |
| Methane metabolism                          | 9     | 0.089872 | 1    | 0.086602 | 2.4464  | 1           | 0.58456  | 0.4     |
| Citrate cycle (TCA cycle)                   | 20    | 0.19971  | 1    | 0.18299  | 1.6983  | 1           | 1        | 0.07184 |
| Starch and sucrose metabolism               | 23    | 0.22967  | 1    | 0.20758  | 1.5722  | 1           | 1        | 0.03778 |
| Galactose metabolism                        | 26    | 0.25963  | 1    | 0.23149  | 1.4632  | 1           | 1        | 0.03644 |
| Glycerophospholipid metabolism              | 30    | 0.29957  | 1    | 0.26233  | 1.3382  | 1           | 1        | 0.02315 |

Total is the total number of compounds in the pathway; the hits is the actually matched number from the user uploaded data; the raw p is the original p value calculated from the enrichment analysis; the

impact is the pathway impact value calculated from pathway topology analysis.

Table S3. Results from Pathway Analysis with MetPA from urine.

| Pathway Name                                | Total | Expected | Hits | Raw p    | -Log(p) | Holm adjust | FDR     | Impact  |
|---------------------------------------------|-------|----------|------|----------|---------|-------------|---------|---------|
| Valine, leucine and isoleucine biosynthesis | 11    | 0.11769  | 2    | 0.005561 | 5.192   | 0.44488     | 0.22522 | 0.66666 |
| Citrate cycle (TCA cycle)                   | 20    | 0.21398  | 2    | 0.01817  | 4.008   | 1           | 0.36794 | 0.09487 |
| Alanine, aspartate and glutamate metabolism | 24    | 0.25678  | 2    | 0.02575  | 3.6593  | 1           | 0.41715 | 0.06645 |
| Glycine, serine and threonine metabolism    | 32    | 0.34237  | 2    | 0.044048 | 3.1225  | 1           | 0.46104 | 0.29197 |
| Taurine and hypotaurine metabolism          | 8     | 0.085592 | 1    | 0.082653 | 2.4931  | 1           | 0.52549 | 0.42857 |
| Primary bile acid biosynthesis              | 46    | 0.49215  | 2    | 0.084338 | 2.4729  | 1           | 0.52549 | 0.05952 |
| Nicotinate and nicotinamide metabolism      | 13    | 0.13909  | 1    | 0.13103  | 2.0324  | 1           | 0.70754 | 0.125   |
| Glyoxylate and dicarboxylate metabolism     | 16    | 0.17118  | 1    | 0.1589   | 1.8395  | 1           | 0.75709 | 0.11111 |
| Glutathione metabolism                      | 26    | 0.27817  | 1    | 0.24589  | 1.4029  | 1           | 0.98012 | 0.00573 |
| Glycerophospholipid metabolism              | 30    | 0.32097  | 1    | 0.27827  | 1.2792  | 1           | 1       | 0.04444 |

Total is the total number of compounds in the pathway; the hits is the actually matched number from the user uploaded data; the raw p is the original p value calculated from the enrichment analysis; the impact is the pathway impact value calculated from pathway topology analysis.

Table S4. Contents of As and Hg in serum sample of control and dosed-group. (ng/g)

| Time   | Element | NC          | LD          | MD          | HD           |
|--------|---------|-------------|-------------|-------------|--------------|
| Day 15 | As      | 2283±949    | 5456±1052*  | 20754±5919* | 64081±5472** |
|        | Hg      | 0.232±0.12  | 0.898±0.23* | 4.745±1.31* | 5.396±2.51** |
| Day 30 | As      | 2429±407.73 | 11428±2561* | 20262±2666* | 50831±6961*  |
|        | Hg      | 0.550±0.26  | 1.034±0.40* | 1.155±0.33* | 1.940±0.96*  |

Data were expressed as mean±SD (n=12). \*P<0.05, \*\*P<0.01 each dosed group vs. control group. NC: Normal control group, LD: Low-dose group, MD: middle-dose group, HD: high-dose group.

Table S5. Contents of As and Hg in urine sample of control and dosed-group. (ng/g)

| Time   | Element | NC           | LD            | MD             | HD             |
|--------|---------|--------------|---------------|----------------|----------------|
| Day 0  | As      | 11.81±8.77   | 16.95±5.53    | 12.18±4.32     | 13.09±53.23    |
|        | Hg      | not detected | not detected  | not detected   | not detected   |
| Day 3  | As      | 8.25±5.18    | 133.50±42.70* | 334.30±48.90*  | 707.70±67.50** |
|        | Hg      | not detected | not detected  | not detected   | not detected   |
| Day 6  | As      | 9.13±4.44    | 172.80±64.70* | 336.10±131.00* | 965.5±202.30** |
|        | Hg      | 0.499±0.59   | not detected  | not detected   | 0.85±0.12      |
| Day 9  | As      | 7.83±4.00    | 142.20±26.30* | 286.30±77.60*  | 1168±330**     |
|        | Hg      | 0.725±0.23   | not detected  | 5.380±1.78*    | 8.880±1.60*    |
| Day 12 | As      | 14.64±7.53   | 209.20±19.60* | 471.70±100*    | 1243±305**     |
|        | Hg      | not detected | 2.308±0.97*   | 6.783±1.35*    | 15.98±3.66*    |
| Day 15 | As      | 12.30±4.55   | 186.10±88.50* | 395.30±131.50* | 1258±206**     |
|        | Hg      | not detected | 19.40±1.89*   | 25.56±3.05*    | 63.75±18.20**  |
| Day 18 | As      | 10.23±4.72   | 60.84±26.1*   | 108.20±52.0*   | 211.50±43.90** |
|        | Hg      | 1.407±0.99   | 5.415±0.78*   | 4.004±0.99*    | 43.14±9.10*    |
| Day 23 | As      | 7.942±4.12   | 36.60±8.66*   | 107.2±43.0*    | 157.20±54.30*  |
|        | Hg      | not detected | 2.476±1.17*   | 5.537±1.37*    | 13.02±0.97*    |
| Day 26 | As      | 9.671±4.78   | 32.461±10.56* | 64.54±25.90*   | 125.5±33.10*   |
|        | Hg      | not detected | 1.397±3.76*   | not detected   | 6.029±0.73*    |
| Day 30 | As      | 10.65±3.57   | 12.84±12.50   | 71.07±26.50*   | 124.8±47.50*   |
|        | Hg      | not detected | not detected  | not detected   | 2.197±0.59*    |

Data were expressed as mean±SD (n=12). \*P<0.05, \*\*P<0.01 each dosed group vs. control group. NC: Normal control group, LD: Low-dose group, MD: middle-dose group, HD: high-dose group.
